# Supplementary material for: Average Daily Gain in Lambs Weaned at 60 Days of Age Is Correlated with Rumen and Rectum Microbiota
Source: MDPI journal article supplement (doi:10.3390/microorganisms11020348), 2023-01-30
Supplement: s1 [file s1]

**Average daily gain in lambs weaned at 60 days of age is correlated with  
rumen and rectum microbiota**

**Xuejiao Yin<sup>1†</sup>, Chunhui Duan<sup>1†</sup>, Shoukun Ji<sup>1</sup>, Peizhi Tian<sup>1</sup>, Sisi Ju<sup>1</sup>, Hui Yan<sup>1</sup>,  
Yingjie Zhang<sup>1\*</sup>, Yueqin Liu<sup>1</sup>**

<sup>1</sup>College of Animal Science and Technology, Hebei Agricultural University,  
Baoding 071000, P. R. China

† These authors have contributed equally to this work.

**\* Correspondence:**

Yingjie Zhang

zhangyingjie66@126.com

Running title: Correlation of gut microbiota to average daily gain.

**Supplementary Table S1. Nutrient composition of experimental diets of Hu sheep (dry matter basis)**

| Items <sup>1</sup> , % | Starter | TMR    |
|------------------------|---------|--------|
| Ingredients            |         |        |
| Cornstalk              |         | 40.00  |
| Corn                   | 53.20   | 35.50  |
| Soybean meal           | 9.10    | 15.00  |
| Wheat bran             | 2.00    | 7.20   |
| Soybean skin           | 6.20    |        |
| Beet pulp              | 4.70    |        |
| Extruded Soybean       | 8.50    |        |
| Fermented soybean meal | 9.60    |        |
| Soybean oil            | 2.20    |        |
| Whey powder            | 2.00    |        |
| Limestone              | 1.20    | 0.30   |
| CaHPO <sub>4</sub>     |         | 0.20   |
| NaCl                   | 0.30    | 0.80   |
| Premix <sup>2</sup>    | 1.00    | 1.00   |
| Total                  | 100.00  | 100.00 |
| Chemical compositions  |         |        |
| Dry matter             | 95.83   | 77.20  |
| Gross energy, MJ/kg DM | 17.56   | 15.07  |

|                         |       |       |
|-------------------------|-------|-------|
| Crude protein           | 21.20 | 14.61 |
| Neutral detergent fiber | 16.44 | 37.60 |
| Acid detergent fiber    | 7.04  | 21.81 |
| Calcium                 | 0.74  | 0.70  |
| Phosphorus              | 0.48  | 0.43  |

<sup>1</sup>Chemical composition measured by AOAC method. TMR: Total Mixed Rations.

<sup>2</sup>Premix containing: 17456 IU/kg of vitamin A, 50 mg/kg of vitamin E, 3740 IU/kg of vitamin D, 98.70 mg/kg of Fe, 72.90 mg/kg of Zn, 57.4 0 mg/kg of Mn, 15.94 mg/kg of Cu, 0.33 mg/kg of Se, 1.30 mg/kg of I and 0.39 mg/kg of Co.
